# Supplementary material for: Environmental Citizen Science Initiatives as a Springboard towards the Education for Environmental Citizenship: A Systematic Literature Review of Empirical Research
Source: MDPI journal article supplement (doi:10.3390/su132413692), 2021-12-11
Supplement: s1 [file s1]

## Supplementary S2. Reviewed Articles.

1. Branchini, S.; Meschini, M.; Covi, C.; Piccinetti, C.; Zaccanti, F.; Goffredo, S. Participating in a citizen science monitoring program: Implications for environmental education. *PLoS ONE* **2015**, 10(7), 1–14. [online] URL: <https://doi.org/10.1371/journal.pone.0131812>
2. Cerrano, C.; Milanese, M.; Ponti, M. Diving for science - science for diving: volunteer scuba divers support science and conservation in the Mediterranean Sea. *Aquatic Conservation: Marine and Freshwater Ecosystems* **2017**, 27(2), 303–323. [online] URL: <https://doi.org/10.1002/aqc.2663>
3. Ceccaroni, L.; Piera, J.; Wernand, M. R.; Zielinski, O.; Busch, J. A.; Jan Van Der Woerd, H.; Bardaji, R.; Friedrichs, A.; Novoa, S.; Thijsse, P.; Velickovski, F.; Blaas, M.; Dubsky, K. Citclops: A next-generation sensor system for the monitoring of natural waters and a citizens' observatory for the assessment of ecosystems' status. *PLoS ONE* **2020**, 15(3). [online] URL: <https://doi.org/10.1371/journal.pone.0230084>
4. Chau, M. M. Rapid Response To a Tree Seed Conservation Challenge in Hawai'i Through Crowdsourcing, Citizen Science, and Community Engagement. *Journal of Sustainable Forestry* **2020**. [online] URL: <https://doi.org/10.1080/10549811.2020.1791186>
5. Cosquer, A.; Raymond, R.; Prevot-Julliard, A. C. Observations of everyday biodiversity: A new perspective for conservation? *Ecology and Society* **2012**, 17(4). [online] URL: <https://doi.org/10.5751/ES-04955-170402>
6. Cunningham, H. R.; Davis, C. A.; Swarth, C. W.; Therres, G. D. The Maryland amphibian and reptile atlas: A volunteer-based distributional survey. *International Journal of Zoology* **2012**. [online] URL: <https://doi.org/10.1155/2012/348653>
7. Davis, E.; Caffrey, J. M.; Coughlan, N. E.; Dick, J. T. A.; Lucy, F. E. Communications, outreach and citizen science: Spreading the word about invasive alien species. *Management of Biological Invasions* **2018**, 9(4), 515–525. [online] URL: <https://doi.org/10.3391/mbi.2018.9.4.14>
8. Deguines, N.; Princé, K.; Prévot, A.C.; Fontaine, B. Assessing the emergence of pro-biodiversity practices in citizen scientists of a backyard butterfly survey. *Science of the Total Environment* **2020**, 716, 136842. [online] URL: <https://doi.org/10.1016/j.scitotenv.2020.136842>
9. Dem, E. S.; Rodríguez-Labajos, B.; Wiemers, M.; Ott, J.; Hirneisen, N.; Bustamante, J. V.; Bustamante, M.; Settele, J. Understanding the relationship between volunteers' motivations and learning outcomes of Citizen Science in rice ecosystems in the Northern Philippines. *Paddy and Water Environment* **2018**, 16(4), 725–735. [online] URL: <https://doi.org/10.1007/s10333-018-0664-9>
10. Dykman, M.; Prahalad, V. Tamar saltmarsh monitoring program: Citizen science monitoring of the tidal treasures of the Tamar river estuary, Tasmania, Australia. *Australian Journal of Maritime and Ocean Affairs* **2018**, 10(4), 222–240. [online] URL: <https://doi.org/10.1080/18366503.2018.1502030>
11. Gharesifard, M.; When, U.; van der Zaag, P. Context matters: A baseline analysis of contextual realities for two community-based monitoring initiatives of water and environment in Europe and Africa. *Journal of Hydrology* **2019**, 579, 124144. [online] URL: <https://doi.org/10.1016/j.jhydrol.2019.124144>
12. Giovos, I.; Kleitou, P.; Poursanidis, D.; Batjakas, I.; Bernardi, G.; Crocetta, F.; Doumpas, N.; Kalogirou, S.; Kampouris, T. E.; Keramidas, I.; Langeneck, J.; Maximidi, M.; Mitsou, E.; Stoilas, V. O.; Tiralongo, F.; Romanidis-Kyriakidis, G.; Xentidis, N. J.; Zenetos, A.; Katsanevakis, S. Citizen-science for monitoring marine invasions and stimulating public engagement: a case project from the eastern Mediterranean. *Biological Invasions* **2019**, 21(12), 3707–3721. [online] URL: <https://doi.org/10.1007/s10530-019-02083-w>
13. Haywood, B. K.; Parrish, J. K.; Dolliver, J. Place-based and data-rich citizen science as a precursor for conservation action. *Conservation Biology* **2016**, 30(3), 476–486. [online] URL: <https://doi.org/10.1111/cobi.12702>
14. Jelks, N. O.; Hawthorne, T. L.; Dai, D.; Fuller, C. H.; Stauber, C. Mapping the hidden hazards: Community-led spatial data collection of street-level environmental stressors in a degraded, urban watershed. *International Journal of Environmental Research and Public Health* **2018**, 15(4). [online] URL: <https://doi.org/10.3390/ijerph15040825>
15. Johnson, J. E.; Hooper, E.; Welch, D. J. Community Marine Monitoring Toolkit: A tool developed in the Pacific to inform community-based marine resource management. *Marine Pollution Bulletin* **2020**, 159, 111498. [online] URL: <https://doi.org/10.1016/j.marpolbul.2020.111498>
16. Kiessling, T.; Salas, S.; Mutafoğlu, K.; Thiel, M. Who cares about dirty beaches? Evaluating environmental awareness and action on coastal litter in Chile. *Ocean and Coastal Management* **2017**, 137, 82–95. [online] URL: <https://doi.org/10.1016/j.ocecoaman.2016.11.029>
17. Kelly, R.; Fleming, A.; Pecl, G. T. Citizen science and social licence: Improving perceptions and connecting marine user groups. *Ocean and Coastal Management* **2019**, 178, 104855. [online] URL: <https://doi.org/10.1016/j.ocecoaman.2019.104855>
18. Mahajan, S.; Kumar, P.; Pinto, J. A.; Riccetti, A.; Schaaf, K.; Camprodon, G.; Smári, V.; Passani, A.; Forino, G. A citizen science approach for enhancing public understanding of air pollution. *Sustainable Cities and Society* **2020**, 52, 101800. [online] URL: <https://doi.org/10.1016/j.scs.2019.101800>
19. Martinelli, M.; Moroni, D. Volunteered geographic information for enhanced marine environment monitoring. *Applied Sciences* **2018**, 8(10). [online] URL: <https://doi.org/10.3390/app8101743>
20. Merenlender, A. M.; Crall, A. W.; Drill, S.; Prysby, M.; Ballard, H. Evaluating environmental education, citizen science, and stewardship through naturalist programs. *Conservation Biology* **2016**, 30(6), 1255–1265. [online] URL: <https://doi.org/10.1111/cobi.12737>

21. Mosites, E.; Lujan, E.; Brook, M.; Brubaker, M.; Roehl, D.; Tcheripanoff, M.; Hennessy, T. Environmental observation, social media, and One Health action: A description of the Local Environmental Observer (LEO) Network. *One Health* **2018**, *6*, 29–33. [online] URL: <https://doi.org/10.1016/j.onehlt.2018.10.002>
22. Musavi, M.; Friess, W. A.; James, C.; Isherwood, J. C. Changing the face of STEM with stormwater research. *International Journal of STEM Education* **2018**, *5*(1), 1–12. [online] URL: <https://doi.org/10.1186/s40594-018-0099-2>
23. Schneiderhan-Opel, J.; Bogner, F. X. The relation between knowledge acquisition and environmental values within the scope of a biodiversity learning module. *Sustainability* **2020**, *12*(5). [online] URL: <https://doi.org/10.3390/su12052036>
24. Pecorelli, J. P.; Macphie, K. H.; Hebditch, C.; Clifton-Dey, D. R. J.; Thornhill, I.; Debney, A. J. Using citizen science to improve the conservation of the European Eel (*Anguilla anguilla*) in the Thames River Basin District. *Freshwater Science* **2019**, *38*(2), 281–291. [online] URL: <https://doi.org/10.1086/703398>
25. Sharma, N.; Greaves, S.; Siddharthan, A.; Anderson, H. B.; Robinson, A.; Colucci-Gray, L.; Wibowo, A. T.; Bostock, H.; Salisbury, A.; Roberts, S.; Slawson, D.; van der Wal, R. From citizen science to citizen action: Analysing the potential for a digital platform to cultivate attachments to nature. *Journal of Science Communication* **2019**, *18*(1), 1–35. [online] URL: <https://doi.org/10.22323/2.18010207>
26. Siano, R.; Chapelle, A.; Antoine, V.; Michel-Guillou, E.; Rigaut-Jalabert, F.; Guillou, L.; Hégaret, H.; Leynaert, A.; Curd, A. Citizen participation in monitoring phytoplankton seawater discolorations. *Marine Policy* **2020**, *117*, 103039. [online] URL: <https://doi.org/10.1016/j.marpol.2018.01.022>
27. Slawson, D. D.; Moffat, A. J. How effective are citizen scientists at contributing to government tree health public engagement and surveillance needs—an analysis of the UK open air laboratories (Opal) survey model. *Insects* **2020**, *11*(9), 1–22. [online] URL: <https://doi.org/10.3390/insects11090550>
28. Storey, R. G.; Wright-Stow, A.; Kin, E.; Davies-Colley, R. J.; Stott, R. Volunteer stream monitoring: Do the data quality and monitoring experience support increased community involvement in freshwater decision making? *Ecology and Society* **2016**, *21*(4):32. [online] URL: <https://doi.org/10.5751/ES-08934-210432>
29. Tsybulsky, D. Self-Reported Reasons for Participating in Pro-environmental Citizen Science Activities: A Case Study of Butterfly Monitoring in Israel. *Frontiers in Education* **2020**, *5*. [online] URL: <https://doi.org/10.3389/feduc.2020.00116>
30. Wallace, D. E.; Bodzin, A. M. Developing Scientific Citizenship Identity Using Mobile Learning and Authentic Practice. *The Electronic Journal of Science Education* **2017**, *21*, 46–71.
31. Yeo, B. G.; Takada, H.; Taylor, H.; Ito, M.; Hosoda, J.; Allinson, M.; Connell, S.; Greaves, L.; McGrath, J. POPs monitoring in Australia and New Zealand using plastic resin pellets, and International Pellet Watch as a tool for education and raising public awareness on plastic debris and POPs. *Marine Pollution Bulletin* **2015**, *101*(1), 137–145. [online] URL: <https://doi.org/10.1016/j.marpolbul.2015.11.006>
